# Supplementary material for: Phase I study of afatinib plus bevacizumab in patients with advanced non-squamous non-small cell lung cancer harboring EGFR mutations
Source: PubMed Central journal article supplement — Transl Lung Cancer Res. 2021 Jan;10(1):183–92. doi: 10.21037/tlcr-20-824 (PMC7867760; doi:10.21037/tlcr-20-824), 2021-01
Supplement: tlcr-10-01-183-dss.pdf [file tlcr-10-01-183-dss.pdf]

## Data Sharing Statement

|              |                                                                                                                                                     |                                                          |
|--------------|-----------------------------------------------------------------------------------------------------------------------------------------------------|----------------------------------------------------------|
| Article Info | <a href="http://dx.doi.org/10.21037/tlcr-20-824">http://dx.doi.org/10.21037/tlcr-20-824</a>                                                         |                                                          |
| <b>Item</b>  | <b>Question</b>                                                                                                                                     | <b>Authors' Response<br/>(place - if not applicable)</b> |
| 1            | Would you like to share data collected for your study to others?                                                                                    | Yes                                                      |
| 2            | If not, would you like to share the reason for your decision?                                                                                       | -                                                        |
| 3            | What data in particular will be shared?                                                                                                             | PFS, response rate, and frequency of T790M mutation      |
| 4            | Any other documents will be shared? Such as study protocol, statistical analysis plan, informed consent form, clinical study report, analytic code. | Study protocol, informed consent form                    |
| 5            | When will data availability begin?                                                                                                                  | At publication                                           |
| 6            | When will data availability end?                                                                                                                    | Three years after it began                               |
| 7            | To whom will you share the data?                                                                                                                    | Clinical researchers in need of the data                 |
| 8            | For what type of analysis or purpose?                                                                                                               | For example, meta-analysis                               |
| 9            | How or where can the data/documents be obtained?                                                                                                    | Contact the corresponding author by e-mail               |
| 10           | Any other restrictions?                                                                                                                             | No                                                       |
